# Supplementary material
Source: HighWire-hosted journal article supplement (http://www.qdcxjkg.com/highwire/filestream/113908/field_highwire_adjunct_files/0/ERJ-01503-2012_Disclosures.pdf)
Supplement: ERJ-01503-2012_Disclosures.pdf [file ERJ-01503-2012_Disclosures.pdf]

**E.H. Bel:** has received on behalf of the department of Respiratory Medicine grants for research from EU-IMI, GSK and Novartis; fees for speaking from Nycomed and GSK; and money for consultancy and participation in advisory boards from Novartis, Shering plough, Merck and GSK.
